# Supplementary material
Source: PubMed Central journal article supplement (PMC8489401)
Supplement: ehp8949.smcontents.508.pdf [file ehp8949.smcontents.508.pdf]

**Note to readers with disabilities:** *EHP* strives to ensure that all journal content is accessible to all readers. However, some figures and Supplemental Material published in *EHP* articles may not conform to [508 standards](#) due to the complexity of the information being presented. If you need assistance accessing journal content, please contact [ehp508@niehs.nih.gov](mailto:ehp508@niehs.nih.gov). Our staff will work with you to assess and meet your accessibility needs within 3 working days.

### **Supplemental Material**

#### **Long-Term Exposure to Transportation Noise and Risk of Incident Stroke: A Pooled Study of Nine Scandinavian Cohorts**

Nina Roswall, Andrei Pyko, Mikael Ögren, Anna Oudin, Annika Rosengren, Anton Lager, Aslak H. Poulsen, Charlotta Eriksson, David Segersson, Debora Rizzuto, Eva M. Andersson, Gunn Marit Aasvang, Gunnar Engström, Jeanette T. Jørgensen, Jenny Selander, Jesper H. Christensen, Jesse Thacher, Karin Leander, Kim Overvad, Kristina Eneroth, Kristoffer Mattisson, Lars Barregård, Leo Stockfelt, Maria Albin, Matthias Ketzel, Mette K. Simonsen, Mårten Spanne, Ole Raaschou-Nielsen, Patrik K.E. Magnusson, Pekka Tiittanen, Peter Molnar, Petter Ljungman, Timo Lanki, Youn-Hee Lim, Zorana J. Andersen, Göran Pershagen, and Mette Sørensen

#### **Table of Contents**

**Table S1.** Detailed information on the cohorts included in the present study.

**Table S2.** Detailed information on estimation of road traffic noise for all participating cohorts.

**Table S3.** Detailed information on estimation of air pollution for all participating cohorts.

**Table S4.** Results from testing the proportional hazard assumption by a correlation test between scaled Schoenfeld residuals and the rank order of event time.

**Table S5.** Correlation matrix between traffic noise exposures and air pollution. Pearson correlation coefficients.

**Table S6.** Categorical association between 5-year road and railway noise exposure and stroke incidence.

**Table S7.** Association between 5-year exposure to traffic noise (per 10 dB) and stroke incidence.

**Table S8.** Association between 5-year time-weighted traffic noise (per 10 dB) and stroke incidence, per cohort.

**Table S9.** Association between 5-year exposure to road traffic noise (per 10 dB) and stroke incidence after one-by-one exclusion of each cohort.

**Table S10.** Interactions between 5-year road traffic noise exposure (per 10 dB) and demographic and lifestyle-factors in relation to stroke incidence.

**Figure S1.** Association between 5-year road traffic and railway noise exposure and risk for incident stroke in models adjusted for age, sex, calendar-year, educational level, marital status, area-income, and other noise sources. The curves were calculated using smoothed splines with four degrees of freedom including 95% confidence intervals (dotted curves).

**Figure S2.** Association between BMI and smoking intensity and risk for incident stroke in models adjusted for age, sex, calendar-year, educational level, marital status, area-income, and other noise sources. The curves were calculated using smoothed splines with four degrees of freedom including 95% confidence intervals (dotted curves).

**Figure S3.** Distribution of exposure to road traffic noise among all (exposures <40 dB set to 40 dB) (a), railway noise among people exposed (i.e. with exposure >40 dB) (b), and aircraft noise among people exposed (i.e. with an exposure >40 dB) (c) 5 years preceding baseline. For railway noise 76% of the population were exposed to <40 dB and for aircraft noise 95% of the population were exposed to  $\leq$ 40 dB.
